# Supplementary material for: Low-temperature NOx(x = 1, 2) removal with ˙OH radicals from catalytic ozonation over a RGO–CeO2nanocomposite: the highly promotional effect of oxygen vacancies
Source: Royal Society of Chemistry journal article supplement (doi:10.1039/c6ra15250c), 2016-01-01
Supplement: c6ra15250c1.pdf [file c6ra15250c1.pdf]

## Supplementary Information

**Fig. S1** XPS spectra of C1s for RGO-CeO<sub>2</sub>, RGO and GO.

**Fig. S2** (a) Effect of SO<sub>2</sub> on the NO<sub>x</sub> (x=1, 2) removal in the present process and (b) the pH variation after introducing exhausted gas into water-isopronol solutions. The SO<sub>2</sub> content is about 500 ppm.

**Fig. S3** Ion chromatography of oxidation products for catalytic ozonation over RGO-CeO<sub>2</sub>, RGO and CeO<sub>2</sub>.

**Table S1** Material balance summary for NO<sub>x</sub> (x=1, 2).

**Fig. S4** (a) N<sub>2</sub> adsorption desorption isotherm curves and (b) the pore size distribution curves for RGO-CeO<sub>2</sub>, RGO, and CeO<sub>2</sub>.

**Fig. S5** Classification of surface hydroxyl groups.

**Fig. S6** IR spectra of (a) RGO-CeO<sub>2</sub> and (b) CeO<sub>2</sub> before and after H<sub>2</sub>O treatment.

**Fig. S7** IR spectra of (a) RGO-CeO<sub>2</sub>-O<sub>3</sub> and (b) CeO<sub>2</sub>-O<sub>3</sub> before and after NO treatment; (c) RGO-CeO<sub>2</sub> and (d) CeO<sub>2</sub> before and after NO treatment.

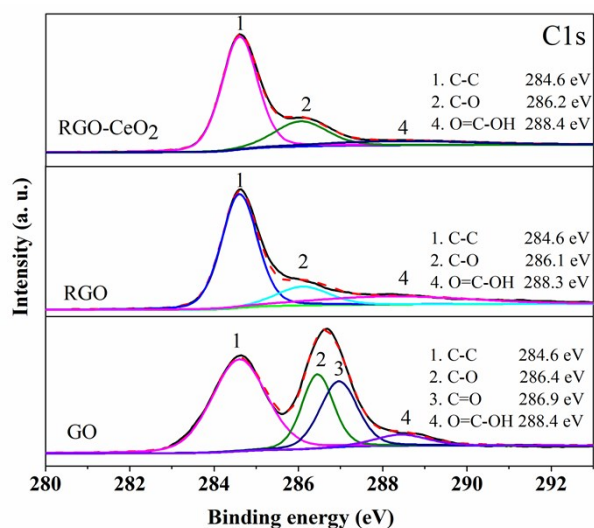

**Fig. S1** XPS spectra of C1s for RGO-CeO<sub>2</sub>, RGO and GO.

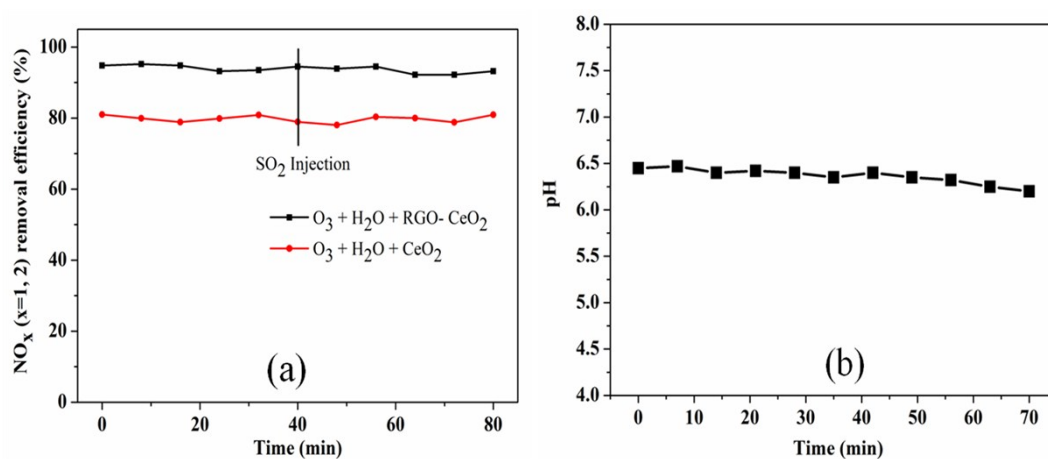

**Fig. S2** (a) Effect of SO<sub>2</sub> on the NO<sub>x</sub> (x=1, 2) removal in the present process and (b) the pH variation after introducing exhausted gas into water-isopronol solutions. The SO<sub>2</sub> content is about 500 ppm.

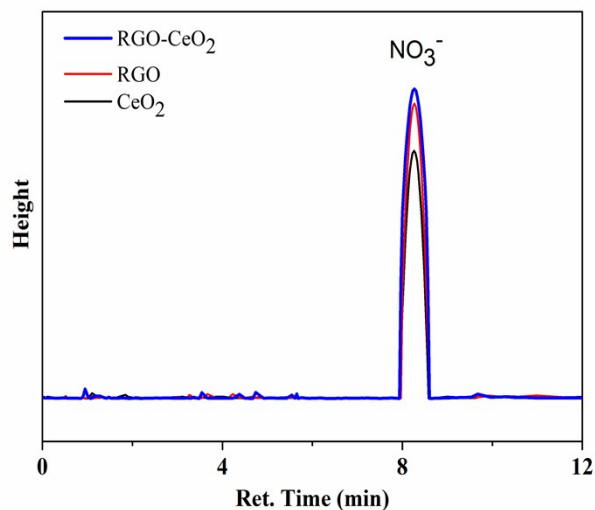

**Fig. S3** Ion chromatography of oxidation products for catalytic ozonation over RGO-CeO<sub>2</sub>, RGO and CeO<sub>2</sub>.

**Table S1** Material balance summary for NO<sub>x</sub> (x=1, 2).

| Category                                                               | RGO-CeO <sub>2</sub> | RGO  | CeO <sub>2</sub> |
|------------------------------------------------------------------------|----------------------|------|------------------|
| Time t, min                                                            | 500                  | 500  | 500              |
| Gas flow Q, mL min <sup>-1</sup>                                       | 185                  | 185  | 185              |
| Solution volume V <sub>L</sub> , mL                                    | 50                   | 50   | 50               |
| C <sub>in</sub> (NO <sub>x</sub> ), ppm                                | 465                  | 455  | 462              |
| C <sub>out</sub> (NO <sub>x</sub> ), ppm                               | 15                   | 28   | 87               |
| C(NO <sub>2</sub> <sup>-</sup> ) actual value, mg L <sup>-1</sup>      | 0                    | 0    | 0                |
| C(NO <sub>3</sub> <sup>-</sup> ) actual value, mg L <sup>-1</sup>      | 1981                 | 1858 | 1642             |
| C(NO <sub>3</sub> <sup>-</sup> ) calculation value, mg L <sup>-1</sup> | 2147                 | 2037 | 1789             |
| C(NO <sub>3</sub> <sup>-</sup> ) error, %                              | 7.7                  | 8.8  | 8.2              |

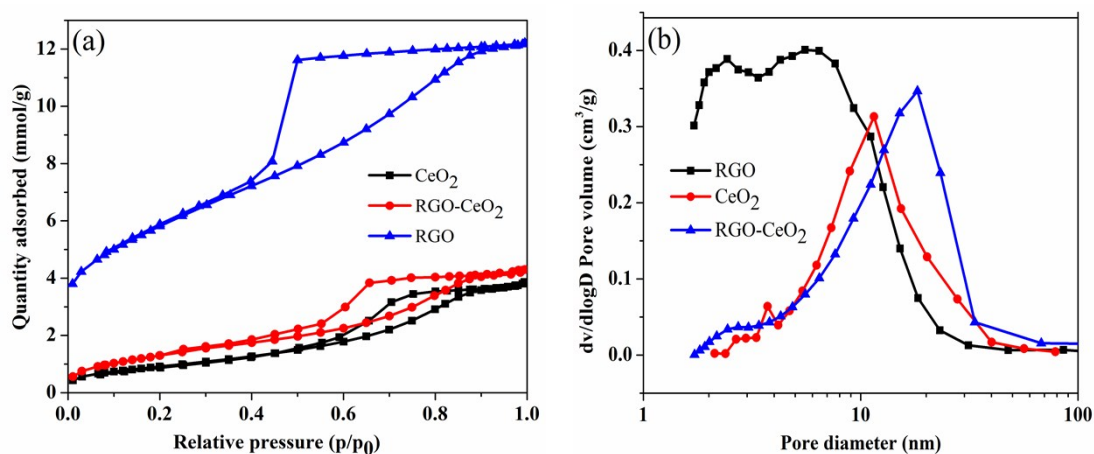

**Fig. S4** (a)  $\text{N}_2$  adsorption desorption isotherm curves and (b) the pore size distribution curves for  $\text{RGO-CeO}_2$ ,  $\text{RGO}$ , and  $\text{CeO}_2$ .

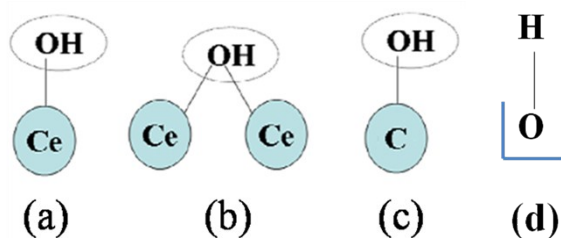

**Fig. S5** Classification of surface hydroxyl groups. Surface  $-\text{OH}$  that connects  $\text{Ce}$  (a),  $\text{Ce}$  and  $\text{Ce}$  (b),  $\text{C}$  (c), and surface  $-\text{OH}$  at an oxygen vacancy site (d). The oxygen vacancy is represented by  $\square$ .

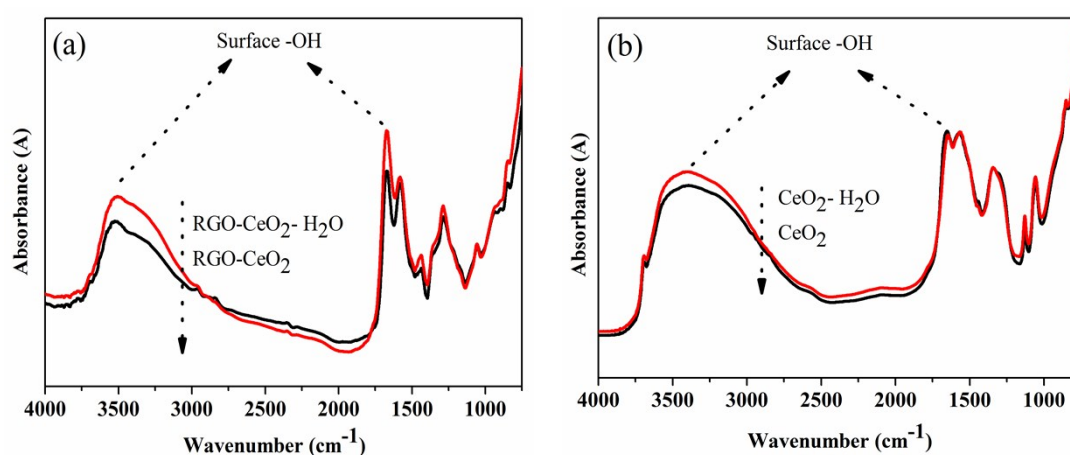

**Fig. S6** IR spectra of (a)  $\text{RGO-CeO}_2$  and (b)  $\text{CeO}_2$  before and after  $\text{H}_2\text{O}$  treatment.

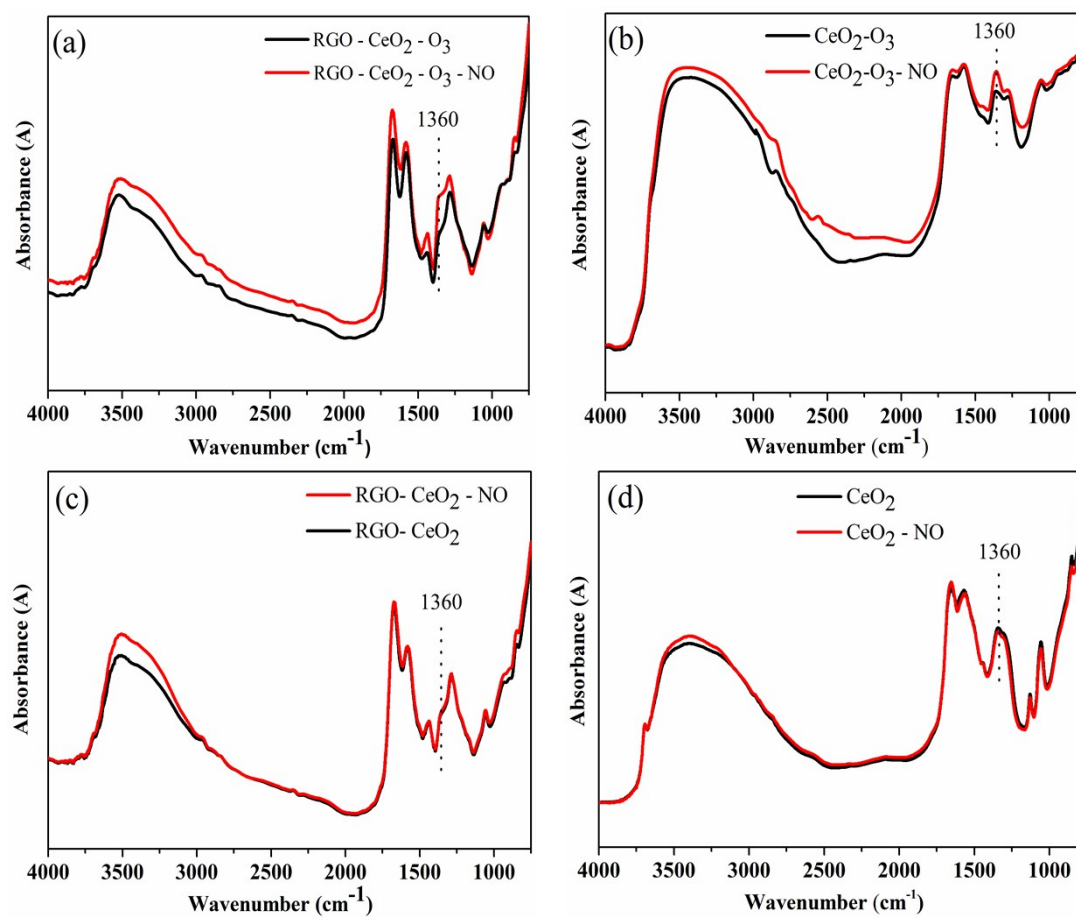

**Fig. S7** IR spectra of (a) RGO- $\text{CeO}_2$ - $\text{O}_3$  and (b)  $\text{CeO}_2$ - $\text{O}_3$  before and after NO treatment; (c) RGO- $\text{CeO}_2$  and (d)  $\text{CeO}_2$  before and after NO treatment.
